# Supplementary material for: Phase I Trial of Fourth-Generation Anti-CD19 Chimeric Antigen Receptor T Cells Against Relapsed or Refractory B Cell Non-Hodgkin Lymphomas
Source: PubMed Central journal article supplement (PMC7731732; doi:10.3389/fimmu.2020.564099), 2020-11-27
Supplement: DataSheet_1.pdf [file DataSheet_1.pdf]

*Supplementary Material*

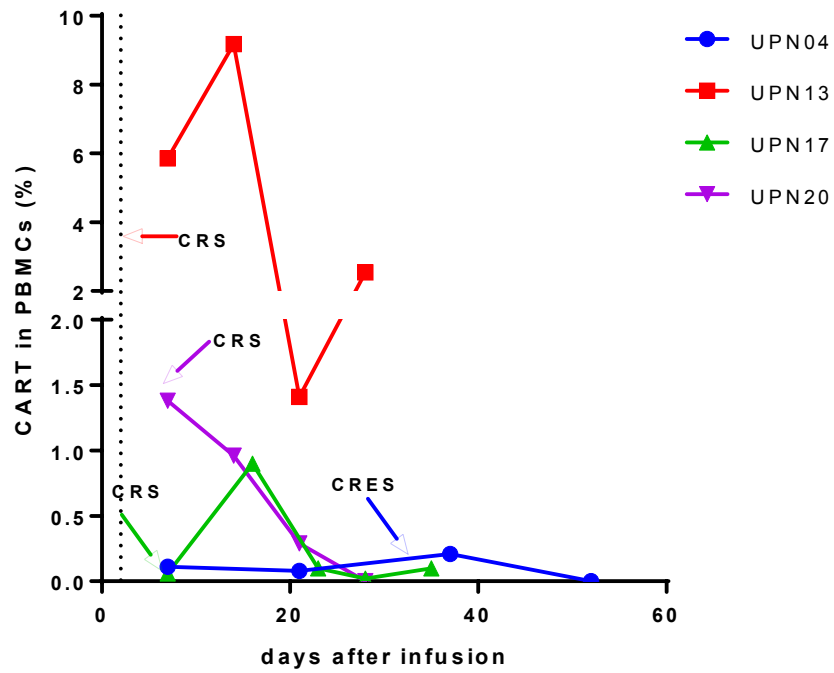

**Supplementary Figure 1.** Relationship between the occurrence of CRS/CRES and expansion of CART cells in vivo.

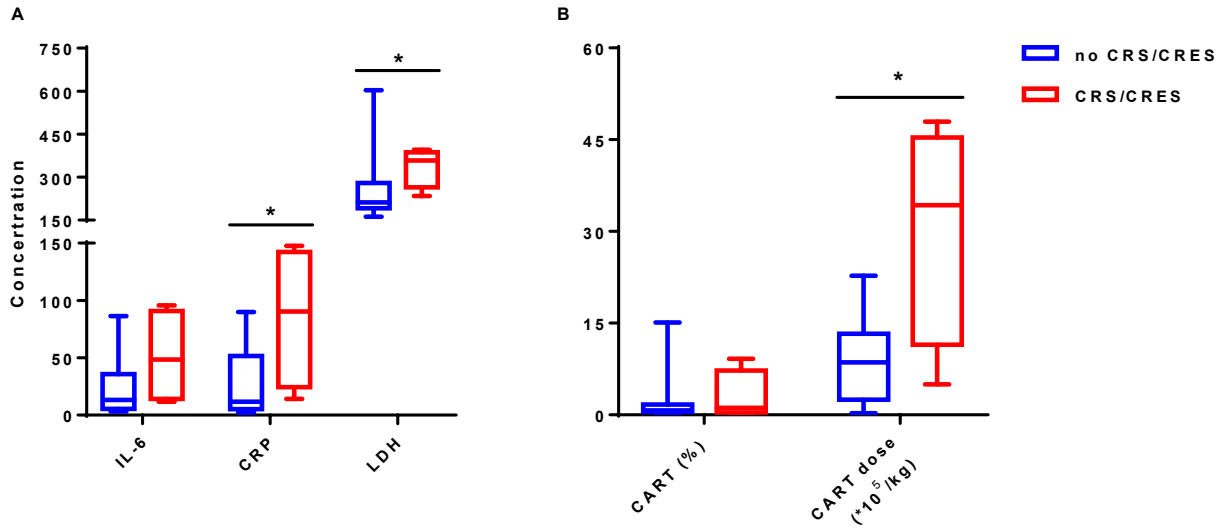

**Supplementary Figure 2.** Analysis of risk factors related to the occurrence of CRS/CRES. The relationship between the occurrence of CRS/CRES and the peak serum concentration of IL-6 and CRP, the concentration of LDH before infusion (A), the infusion dose of CART cells, and the highest level of CART cell expansion in vivo (B).

**Supplementary Table 1.** 4SCAR19 T cell dose administered.

|                                                            | <b>Patients (N=21)</b> |
|------------------------------------------------------------|------------------------|
| CAR-positive viable T-cell dose infused ( $10^5$ cells/kg) |                        |
| Mean (SD)                                                  | 13.08 (12.89)          |
| Median                                                     | 8.87                   |
| Range                                                      | 0.28~47.96             |
| Total cell dose infused ( $10^6$ cells/kg)                 |                        |
| Mean (SD)                                                  | 2.75 (1.48)            |
| Median                                                     | 2.47                   |
| Range                                                      | 0.39~7.44              |

**Supplementary Table 2.** Differences in remission time after infusion in patients with complete remission and partial remission.

| <b>Efficacy</b> | <b>Time post-infusion/days</b> |             | <b>Statistic</b> | <b>Sig.</b> |
|-----------------|--------------------------------|-------------|------------------|-------------|
| <b>CR</b>       | Mean                           |             | 49.78            | 0.509       |
|                 | 95% CI for Mean                | Lower Bound | 41.31            |             |
|                 |                                | Upper Bound | 58.25            |             |
|                 | Median                         |             | 54               |             |
|                 | Std. Deviation                 |             | 11.020           |             |
|                 | Minimum                        |             | 34               |             |
| Maximum         |                                | 63          |                  |             |
| <b>PR</b>       | Mean                           |             | 55.00            |             |
|                 | 95% CI for Mean                | Lower Bound | 36.90            |             |
|                 |                                | Upper Bound | 73.10            |             |
|                 | Median                         |             | 61               |             |
|                 | Std. Deviation                 |             | 14.577           |             |
|                 | Minimum                        |             | 29               |             |
| Maximum         |                                | 63          |                  |             |

**Supplementary Table 3.** Prolonged cytopenias in all patients in the study.

| <b>Prolonged Cytopenias, %</b>                    | <b>Patients (N=21)</b> |                   |                    |
|---------------------------------------------------|------------------------|-------------------|--------------------|
|                                                   | at any time            | at $\geq$ 28 days | at $\geq$ 3 months |
| <b>Neutropenia <math>\geq</math> grade 3</b>      | 76%                    | 29%               | 14%                |
| <b>Anemia <math>\geq</math> grade 3</b>           | 24%                    | 14%               | 0%                 |
| <b>Thrombocytopenia <math>\geq</math> grade 3</b> | 29%                    | 29%               | 10%                |
